# Supplementary material
Source: PubMed Central journal article supplement (PMC8022404)

**Figure S1. Flow chart showing sample size included in the study**

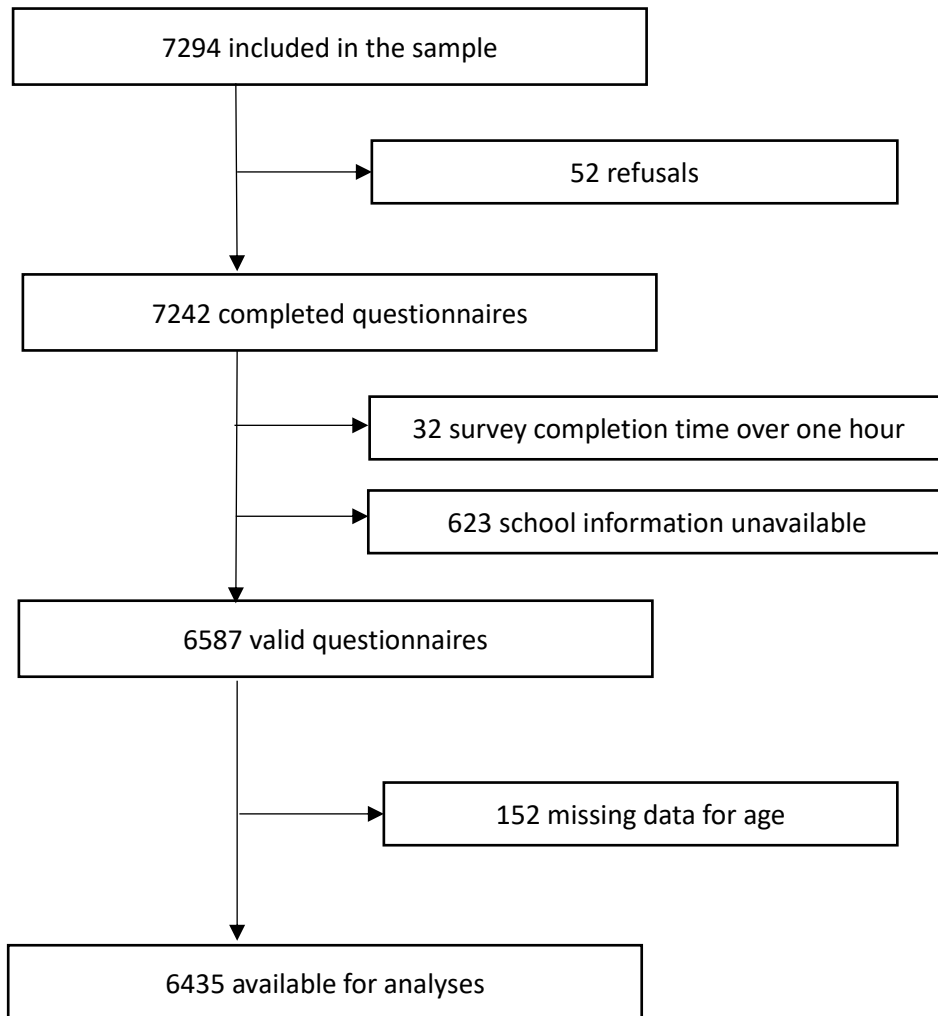

Supplement: 12992_2021_693_MOESM1_ESM.pdf [file 12992_2021_693_MOESM1_ESM.pdf]
